# Supplementary material
Source: publisher figshare collection journal article supplement (https://tandf.figshare.com/articles/dataset/_/13365394)
Supplement: Supplementary file 1 [file 1]

| Specimen no. | Taxon (on label)               | corr. Taxon                             | Site                   |
|--------------|--------------------------------|-----------------------------------------|------------------------|
| ДВХ3043      | Salvinia                       | Salvinia                                | р. Кизак Kizak river   |
| ДВХ3043-6    | Alnus                          | <i>Alnus julianiformis</i>              | р. Шиш Shish river     |
| ДВХ3043-7    | Pterocarya                     | <i>cf. Juglans zaianica</i>             | р. Бича Bicha river    |
| ДВХ3043-8    | Populus                        | <i>Byttneriophyllum tiliifolium</i>     | р. Бича Bicha river    |
| ДВХ3043-9    | Populus latior                 | <i>Populus cf. balsamoides</i>          | р. Шиш Shish river     |
| ДВХ3043-10   | Alnus                          | <i>indet. cf. Rosa</i>                  | р. Туртас Turtas river |
| ДВХ3043-11   |                                | <i>Platycrater iljinskajae sp. nov.</i> | р. Шиш Shish river     |
| ДВХ3043-13   | Ulmus longifolia               | <i>Ulmus pyramidalis</i>                | р. Кизак Kizak river   |
| ДВХ3043-14   | Populus latior                 | Populus latior                          | р. Шиш Shish river     |
| ДВХ3043-15   | Populus latior                 | Populus latior                          | р. Шиш Shish river     |
| ДВХ3043-16   | Populus latior                 | Populus latior                          | р. Шиш Shish river     |
| ДВХ3043-17   | Populus latior                 | Populus latior                          | р. Шиш Shish river     |
| ДВХ3043-18   | Populus latior var. kisakensis |                                         | р. Кизак Kizak river   |
| ДВХ3043-19   | Populus latior                 | <i>Populus cf. balsamoides</i>          | р. Шиш Shish river     |
| ДВХ3043-20   | Populus latior                 | Populus latior                          | р. Шиш Shish river     |
| ДВХ3043-21   | Populus latior                 | Populus latior                          | р. Шиш Shish river     |
| ДВХ3043-22   | Quercus pseudorobur            | <i>Quercus pseudocastanea</i>           | р. Кизак Kizak river   |
| ДВХ3043-23   | Typha latissima                | <i>cf. Typha</i>                        | р. Кизак Kizak river   |
| ДВХ3043-24   | Ulmus longifolia               | <i>Ulmus pyramidalis</i>                | р. Кизак Kizak river   |
| ДВХ3043-25   | Alangium aequalifolium         | <i>Byttneriophyllum tiliifolium</i>     | р. Кизак Kizak river   |
| ДВХ3043-26   | Ulmus longifolia               | <i>Ulmus pyramidalis</i>                | р. Кизак Kizak river   |
| ДВХ3043-27   | Quercus pseudorobur            | <i>Quercus pseudocastanea</i>           | р. Кизак Kizak river   |
| ДВХ3043-28   | Quercus pseudorobur            | <i>Quercus pseudocastanea</i>           | р. Кизак Kizak river   |
| ДВХ3043-29   | Trapa praeconocarpa            | <i>Hemitrapa praeconocarpa</i>          | р. Туртас Turtas river |
| ДВХ3043-30   | Trapa praeconocarpa            | <i>Hemitrapa praeconocarpa</i>          | р. Шиш Shish river     |
| ДВХ3043-31   | Trapa praeconocarpa            | <i>Hemitrapa praeconocarpa</i>          | р. Шиш Shish river     |
| ДВХ3043-32   | Trapa praeconocarpa            | <i>Hemitrapa praeconocarpa</i>          | р. Шиш Shish river     |
| ДВХ3043-33   | Nyssa                          | Nyssa                                   | р. Шиш Shish river     |
| ДВХ3043-34   | Populus latior                 | Populus latior                          | р. Шиш Shish river     |
| ДВХ3043-35   | Populus latior                 | Populus latior                          | р. Шиш Shish river     |
| ДВХ3043-36   | Populus latior                 | Populus latior                          | р. Шиш Shish river     |
| ДВХ3043-36   |                                | <i>Populus sp. (bract)</i>              | р. Шиш Shish river     |
| ДВХ3043-37   | Populus latior                 | Populus latior                          | р. Шиш Shish river     |
| ДВХ3043-38   | Populus latior                 | Populus latior                          | р. Шиш Shish river     |
| ДВХ3043-39   | Populus latior                 | Populus latior                          | р. Шиш Shish river     |
| ДВХ3043-40   | Populus latior                 | Populus latior                          | р. Шиш Shish river     |
| ДВХ3043-41   | Populus latior                 | Populus latior                          | р. Шиш Shish river     |
| ДВХ3043-42   | Populus latior                 | Populus latior                          | р. Шиш Shish river     |
| ДВХ3043-43   | Populus latior                 | Populus latior                          | р. Шиш Shish river     |
| ДВХ3043-44   | Populus latior                 | Populus latior                          | р. Шиш Shish river     |
| ДВХ3043-45   | Populus latior                 | Populus latior                          | р. Шиш Shish river     |
| ДВХ3043-46   | Liquidambar sp.                | <i>Liquidambar europaea</i>             | р. Шиш Shish river     |
| ДВХ3043-47   | Nelumbium cf. buchii           | <i>Nelumbo protospeciosa</i>            | р. Шиш Shish river     |
| ДВХ3043-47   | Nelumbium cf. buchii           | <i>Nelumbo protospeciosa</i>            | р. Шиш Shish river     |
| ДВХ3043-48   | Castanea atavia                | <i>Quercus kubinyii</i>                 | р. Шиш Shish river     |
| ОФ9187-2     | VI-25-2a                       | <i>Byttneriophyllum tiliifolium</i>     | р. Туртас Turtas river |
| ОФ9187-2     | VI-25-2b                       | <i>Byttneriophyllum tiliifolium</i>     | р. Туртас Turtas river |
| ОФ9187-2     | VI-25-3                        | <i>Byttneriophyllum tiliifolium</i>     | р. Туртас Turtas river |
| ОФ9187-4     | Pterocarya castaneifolia       | <i>Pterocarya paradisiaca</i>           | р. Туртас Turtas river |
| ОФ9187-10    | Typha latissima                | Typha latissima                         | р. Кизак Kizak river   |
| ОФ9187-12    | Betula brongniartii            | <i>Betula</i>                           | р. Кизак Kizak river   |
| ОФ9187-12    | Betula brongniartii            | <i>Betula</i>                           | р. Кизак Kizak river   |
| ОФ9187-13    | Ulmus carpinoides              | <i>Ulmus pyramidalis</i>                | р. Кизак Kizak river   |
| ОФ9187-14    | Ulmus longifolia               | <i>Carpinus grandis</i>                 | р. Кизак Kizak river   |
| ОФ9187-14    |                                | <i>Phragmites</i>                       | р. Кизак Kizak river   |
| ОФ9187-15    | Ulmus longifolia               | <i>Ulmus pyramidalis</i>                | р. Кизак Kizak river   |

|           |                                |                         |           |              |
|-----------|--------------------------------|-------------------------|-----------|--------------|
| ОФ9187-16 | Ulmus longifolia               | Ulmus pyramidalis       | р. Кизак  | Kizak river  |
| ОФ9187-16 | Ulmus longifolia               | Ulmus pyramidalis       | р. Кизак  | Kizak river  |
| ОФ9187-17 | Populus latior var. kisakensis | Populus glandulifera    | р. Кизак  | Kizak river  |
| ОФ9187-18 | Populus latior var. kisakensis | Populus glandulifera    | р. Кизак  | Kizak river  |
| ОФ9187-19 | Quercus pseudorobur            | Quercus pseudocastanea  | р. Кизак  | Kizak river  |
| ОФ9187-21 | Quercus pseudorobur            | Quercus pseudocastanea  | р. Кизак  | Kizak river  |
| ОФ9187-22 | Quercus pseudorobur            | Quercus pseudocastanea  | р. Кизак  | Kizak river  |
| ОФ9187-23 | Quercus pseudorobur            | Quercus pseudocastanea  | р. Кизак  | Kizak river  |
| ОФ9187-25 | Salix varians                  | Salix varians           | р. Кизак  | Kizak river  |
| ОФ9187-25 |                                | conifer needle          | р. Кизак  | Kizak river  |
| ОФ9187-25 |                                | Quercus pseudocastanea  | р. Кизак  | Kizak river  |
| ОФ9187-36 | Trapa praeconocarpa            | Hemitrapa praeconocarpa | р. Шиш    | Shish river  |
| ОФ9187-39 | Trapa praeconocarpa            | Hemitrapa praeconocarpa | р. Шиш    | Shish river  |
| ОФ9187-42 | Populus glandulifera           | Populus sp.             | р. Шиш    | Shish river  |
| ОФ9187-49 | Castanea atavia                | Quercus kubinyii        | р. Шиш    | Shish river  |
| ОФ9187-52 | Populus latior                 | Populus latior          | р. Шиш    | Shish river  |
| ОФ9187-53 | Populus latior                 | Populus latior          | р. Шиш    | Shish river  |
| ОФ9187-54 | Populus latior                 | Populus latior          | р. Шиш    | Shish river  |
| ОФ9187-55 | Populus latior                 | Populus latior          | р. Шиш    | Shish river  |
| ОФ9187-58 | Populus latior                 | Populus latior          | р. Шиш    | Shish river  |
| ОФ9187-59 | Populus latior                 | Populus latior          | р. Шиш    | Shish river  |
| ОФ9187-60 | Populus latior                 | Populus latior          | р. Шиш    | Shish river  |
| ОФ9187-61 | Populus latior                 | Populus latior          | р. Шиш    | Shish river  |
| ОФ9187-62 | Populus latior                 | Populus latior          | р. Шиш    | Shish river  |
| ОФ9187-63 | Populus latior                 | Populus latior          | р. Шиш    | Shish river  |
| ОФ9187-64 | Populus latior                 | Populus latior          | р. Шиш    | Shish river  |
| ОФ9187-65 | Populus latior                 | Populus latior          | р. Шиш    | Shish river  |
| ОФ9187-66 | Populus latior                 | Populus latior          | р. Шиш    | Shish river  |
| ОФ9187-67 | Populus latior                 | Populus latior          | р. Шиш    | Shish river  |
| ОФ9187-68 | Populus latior                 | Populus latior          | р. Шиш    | Shish river  |
| ОФ9187-70 | Populus latior                 | Populus latior          | р. Шиш    | Shish river  |
| ОФ9187-71 | Populus latior                 | Populus latior          | р. Шиш    | Shish river  |
| ОФ9187-72 | Populus latior                 | Populus latior          | р. Шиш    | Shish river  |
| ОФ9187-73 | Populus latior                 | Populus latior          | р. Шиш    | Shish river  |
| ОФ9187-74 | Populus latior                 | Populus latior          | р. Шиш    | Shish river  |
| ОФ9187-75 | Populus latior                 | Populus latior          | р. Шиш    | Shish river  |
| ОФ9187-76 | Populus latior                 | Populus latior          | р. Шиш    | Shish river  |
| ОФ9187-77 | Populus latior                 | Populus latior          | р. Шиш    | Shish river  |
| ОФ9187-78 | Populus latior                 | Populus latior          | р. Шиш    | Shish river  |
| ОФ9187-79 | Populus latior                 | Populus latior          | р. Шиш    | Shish river  |
| ОФ9187-80 | Populus latior                 | Populus latior          | р. Шиш    | Shish river  |
| ОФ9187-81 | Populus latior                 | Populus latior          | р. Шиш    | Shish river  |
| ОФ9187-82 | Populus latior                 | Populus latior          | р. Шиш    | Shish river  |
| ОФ9187-83 | Populus latior                 | Populus latior          | р. Шиш    | Shish river  |
| ОФ9187-84 | Populus latior                 | Populus latior          | р. Шиш    | Shish river  |
| ОФ9187-85 | Populus latior                 | Populus latior          | р. Шиш    | Shish river  |
| ОФ9187-86 | Populus latior                 | Populus latior          | р. Шиш    | Shish river  |
| ОФ9187-93 | Phragmites oeningensis         | Phragmites oeningensis  | р. Туртас | Turtas river |
| ОФ9187-93 | Phragmites oeningensis         | Phragmites oeningensis  | р. Туртас | Turtas river |
| ОФ9187-94 | Pterocarya castaneifolia       | Pterocarya paradisiaca  | р. Бича   | Bicha river  |
| ОФ9187-94 | Pterocarya castaneifolia       | Pterocarya paradisiaca  | р. Бича   | Bicha river  |
| ОФ9187-95 | Pterocarya castaneifolia       | Pterocarya paradisiaca  | р. Бича   | Bicha river  |
| ОФ9187-96 |                                | Alnus sp.               | ?         | ?            |

**Appendix 1:**

**List of specimens with labels investigated for the present study with label information indicating storage, specimen number, and taxonomic identification.**

**Current determination is indicated as well and highlighted in blue if deviating from previous one.**

| Life form          | Abundance |        |
|--------------------|-----------|--------|
| Spores             | 32        | 6,40%  |
| Gymnosperms        | 277       | 55,40% |
| Angiosperm herb    | 8         | 1,60%  |
| Angiosperm woody   | 182       | 36,40% |
| Sum counted grains | 499       |        |

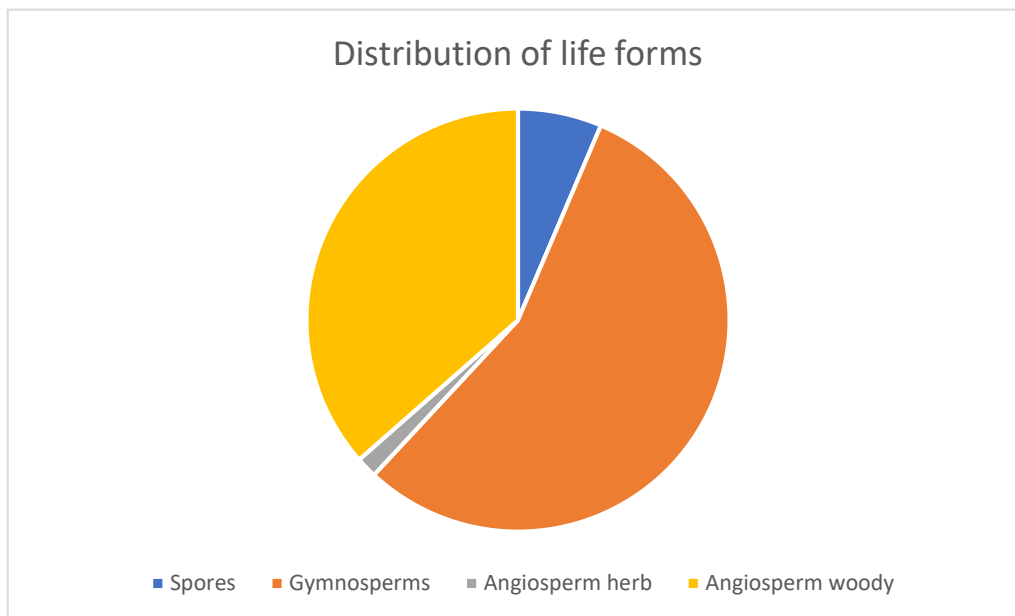

### Appendix 2:

**Shish River site: Abundance of life forms based on 500 counted grains.  
Heat map and cake diagram illustrate most frequent life forms.**

| collectionCode | catalogNumber | family        | genus       | specificEpithet | scientificNameAuthorship | scientificName                     | nomenclaturalCode | country | countryCode | itemType |
|----------------|---------------|---------------|-------------|-----------------|--------------------------|------------------------------------|-------------------|---------|-------------|----------|
| P              | P00709534     | Hydrangeaceae | Platycrater | arguta          | Siebold & Zucc.          | Platycrater arguta Siebold & Zucc. | ICN               | Japon   | JP          | Herbier  |
| P              | P04573221     | Hydrangeaceae | Platycrater | arguta          | Siebold & Zucc.          | Platycrater arguta Siebold & Zucc. | ICN               |         |             | Herbier  |
| P              | P04573222     | Hydrangeaceae | Platycrater | arguta          | Siebold & Zucc.          | Platycrater arguta Siebold & Zucc. | ICN               |         |             | Herbier  |
| P              | P04573223     | Hydrangeaceae | Platycrater | arguta          | Siebold & Zucc.          | Platycrater arguta Siebold & Zucc. | ICN               |         |             | Herbier  |
| P              | P04573224     | Hydrangeaceae | Platycrater | arguta          | Siebold & Zucc.          | Platycrater arguta Siebold & Zucc. | ICN               |         |             | Herbier  |
| P              | P04573225     | Hydrangeaceae | Platycrater | arguta          | Siebold & Zucc.          | Platycrater arguta Siebold & Zucc. | ICN               |         |             | Herbier  |
| P              | P04573226     | Hydrangeaceae | Platycrater | arguta          | Siebold & Zucc.          | Platycrater arguta Siebold & Zucc. | ICN               |         |             | Herbier  |
| P              | P04573227     | Hydrangeaceae | Platycrater | arguta          | Siebold & Zucc.          | Platycrater arguta Siebold & Zucc. | ICN               |         |             | Herbier  |
| P              | P04573228     | Hydrangeaceae | Platycrater | arguta          | Siebold & Zucc.          | Platycrater arguta Siebold & Zucc. | ICN               |         |             | Herbier  |
| P              | P04573229     | Hydrangeaceae | Platycrater | arguta          | Siebold & Zucc.          | Platycrater arguta Siebold & Zucc. | ICN               |         |             | Herbier  |
| P              | P04573230     | Hydrangeaceae | Platycrater | arguta          | Siebold & Zucc.          | Platycrater arguta Siebold & Zucc. | ICN               |         |             | Herbier  |
| P              | P04573231     | Hydrangeaceae | Platycrater | arguta          | Siebold & Zucc.          | Platycrater arguta Siebold & Zucc. | ICN               |         |             | Herbier  |
| P              | P04573232     | Hydrangeaceae | Platycrater | arguta          | Siebold & Zucc.          | Platycrater arguta Siebold & Zucc. | ICN               |         |             | Herbier  |
| P              | P04573233     | Hydrangeaceae | Platycrater | arguta          | Siebold & Zucc.          | Platycrater arguta Siebold & Zucc. | ICN               |         |             | Herbier  |
| P              | P04573234     | Hydrangeaceae | Platycrater | arguta          | Siebold & Zucc.          | Platycrater arguta Siebold & Zucc. | ICN               |         |             | Herbier  |
| P              | P04573235     | Hydrangeaceae | Platycrater | arguta          | Siebold & Zucc.          | Platycrater arguta Siebold & Zucc. | ICN               |         |             | Herbier  |
| P              | P04573236     | Hydrangeaceae | Platycrater | arguta          | Siebold & Zucc.          | Platycrater arguta Siebold & Zucc. | ICN               |         |             | Herbier  |
| P              | P04573237     | Hydrangeaceae | Platycrater | arguta          | Siebold & Zucc.          | Platycrater arguta Siebold & Zucc. | ICN               |         |             | Herbier  |
| P              | P04573238     | Hydrangeaceae | Platycrater | arguta          | Siebold & Zucc.          | Platycrater arguta Siebold & Zucc. | ICN               |         |             | Herbier  |
| P              | P04573327     | Hydrangeaceae | Platycrater | serrata         | Makino                   | Platycrater serrata Makino         | ICN               |         |             | Herbier  |
| P              | P04557370     | Hydrangeaceae | Platycrater | arguta          | Siebold & Zucc.          | Platycrater arguta Siebold & Zucc. | ICNCP             |         |             | Herbier  |

Downloaded from:

<https://science.mnhn.fr/institution/mnhn/collection/p/item/list?genus=Platycrater>

### Appendix 3: Records of *Platycrater arguta* from herbarium Paris (P)
